# Supplementary material for: Efficient sampling of high-dimensional free energy landscapes using adaptive reinforced dynamics
Source: Springer Nature journal article supplement (doi:10.1038/s43588-021-00173-1), 2021-12-24
Supplement: 43588_2021_173_MOESM1_ESM.pdf [file 43588_2021_173_MOESM1_ESM.pdf]

---

**Supplementary information**

---

**Efficient sampling of high-dimensional free energy landscapes using adaptive reinforced dynamics**

---

In the format provided by the authors and unedited

# Supplementary Information for Efficient sampling of high-dimensional free energy landscapes using adaptive reinforced dynamics

Dongdong Wang and Linfeng Zhang\*

*Program in Applied and Computational Mathematics,  
Princeton University, Princeton, NJ 08544, USA*

Yanze Wang and Junhan Chang

*College of Chemistry and Molecular Engineering,  
Peking University, Beijing, 100871, P.R. China and  
DP Technology, Beijing, 100080, P.R. China*

Han Wang<sup>†</sup>

*Laboratory of Computational Physics,  
Institute of Applied Physics and Computational Mathematics,  
Fenghao East Road 2, Beijing 100094, P.R. China*

Weinan E

*Department of Mathematics and Program in Applied and Computational Mathematics,  
Princeton University, Princeton, NJ 08544, USA and  
Beijing Institute of Big Data Research, Beijing, 100871, P.R. China*

---

\*Electronic address: [linfeng.zhang.zlf@gmail.com](mailto:linfeng.zhang.zlf@gmail.com)

<sup>†</sup>Electronic address: [wang\\_han@iapcm.ac.cn](mailto:wang_han@iapcm.ac.cn)

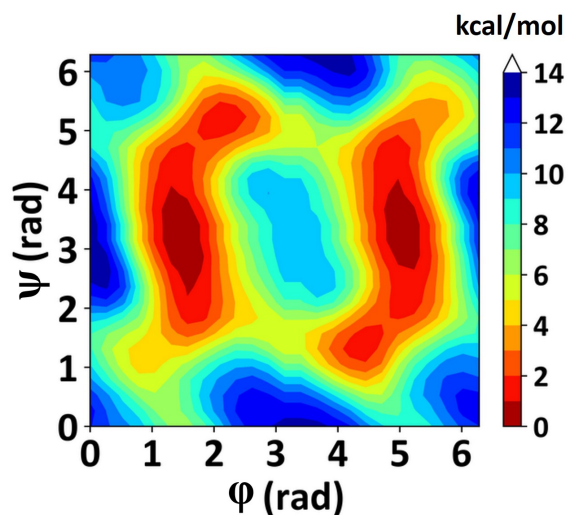

Supplementary Figure 1: The free energy of s1pe projected on  $\phi$  and  $\psi$ .

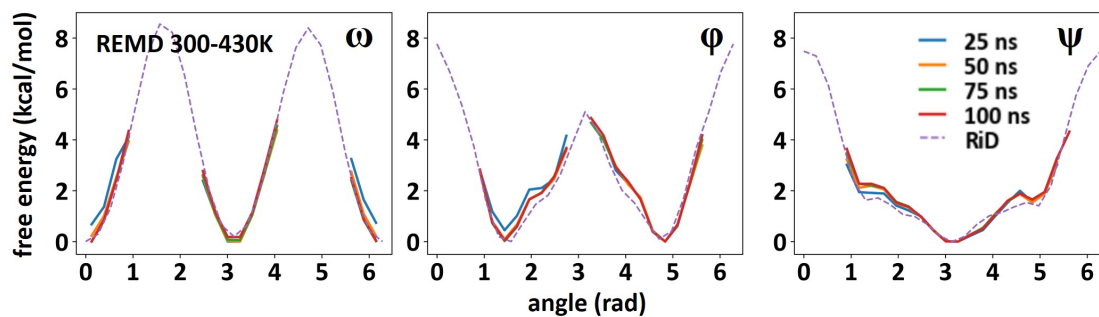

Supplementary Figure 2: Assessing the convergence of the free energy curve of each angle of the peptoid s1pe derived from REMD trajectory at 300K.

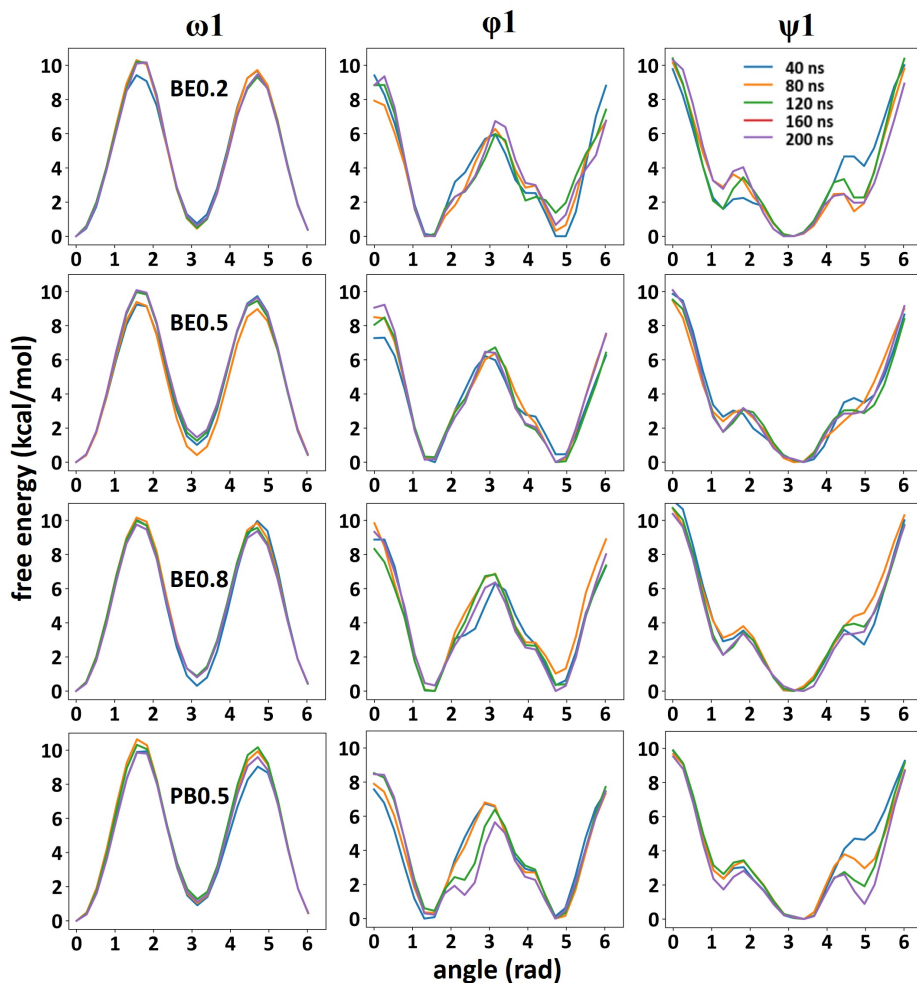

Supplementary Figure 3: Assessing the convergence of different metadynamics simulations of peptoid trimer (s1pe)3. Free energy curves of first three angles of the peptoid trimer (s1pe)3 derived from different metadynamics trajectories. Three bias-exchange metadynamics (BE-MetaD) simulations are conducted. Among them, the parameters of BE0.2 derived from plumID:19.059 are [PACE=1000 HEIGHT=0.2 SIGMA=0.17 GRID\_MIN=-pi GRID\_MAX=pi BIASFACTOR=10.0 TEMP=300]. The parameters of BE0.5 derived from plumID:21.014 are [PACE=500 HEIGHT=0.5 SIGMA=0.015 SIGMA\_MAX=0.6 SIGMA\_MIN=0.03 ADAPTIVE=GEOM GRID\_MIN=-pi GRID\_MAX=pi BIASFACTOR=10.0 TEMP=300]. The parameters of BE0.8 are [PACE=500 HEIGHT=0.8 SIGMA=0.25 GRID\_MIN=-pi GRID\_MAX=pi BIASFACTOR=10.0 TEMP=300]. One parallel-bias metadynamics (PBMetaD) simulation is conducted and its parameters derived from plumID:21.014 are [PACE=500 HEIGHT=0.5 SIGMA=0.015 SIGMA\_MAX=0.6 SIGMA\_MIN=0.03 ADAPTIVE=GEOM GRID\_MIN=-pi GRID\_MAX=pi BIASFACTOR=10.0 TEMP=300], named PB0.5.

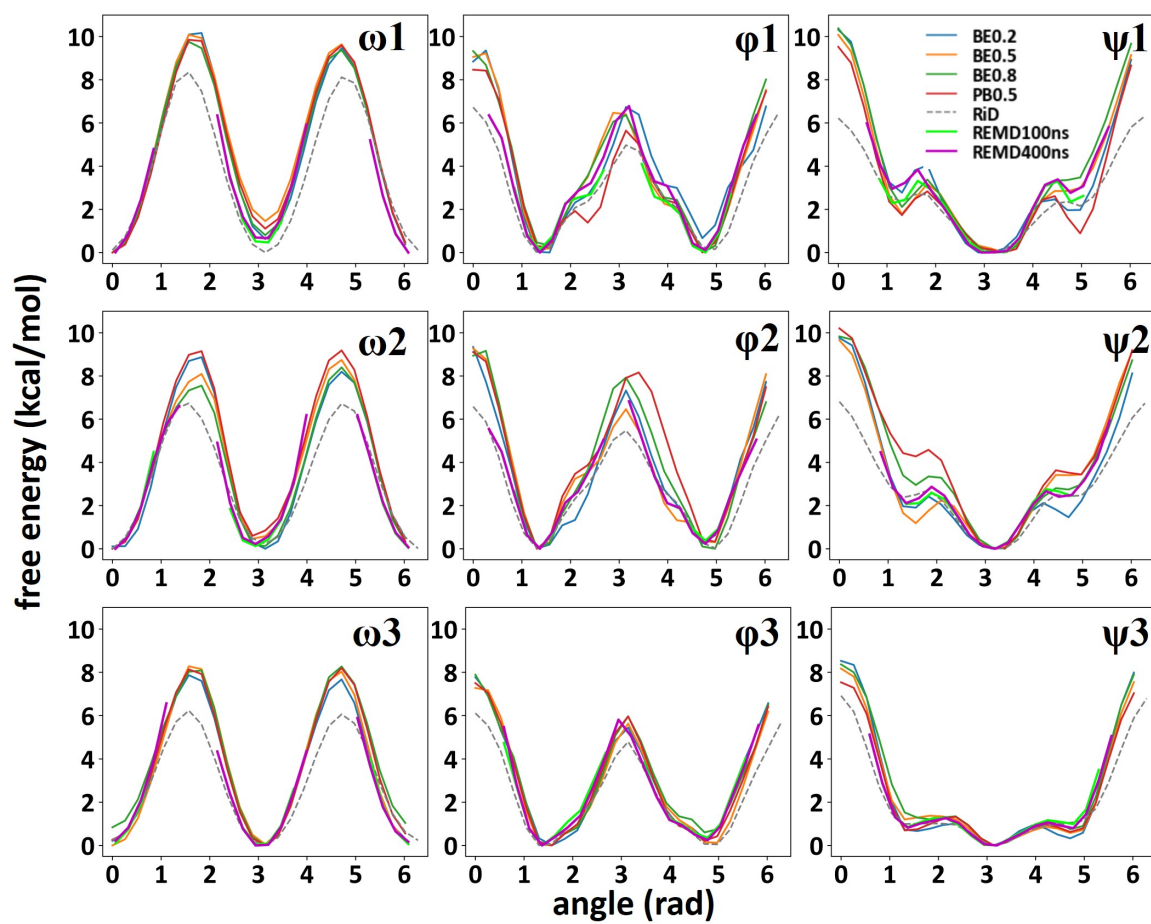

Supplementary Figure 4: The comparison of the free energy curve of each angle of the peptoid trimer (s1pe)<sub>3</sub> derived from different metadynamics, adaptive RiD and REMD 300-680K of 100ns with REMD 300-680K of 400ns.

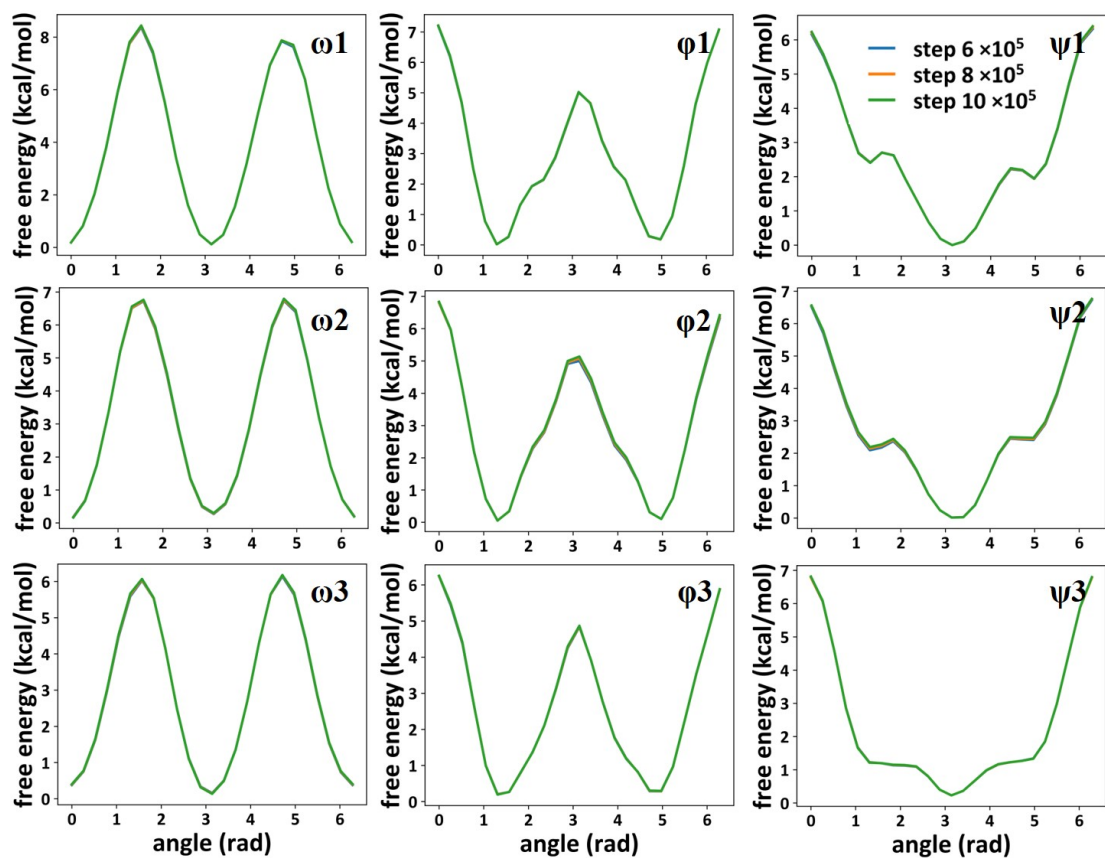

Supplementary Figure 5: Assessing the convergence of MCMC simulations of  $(s1pe)_3$ . The high-dimensional FES used in MCMC simulations is from 140th iteration of adaptive RiD.

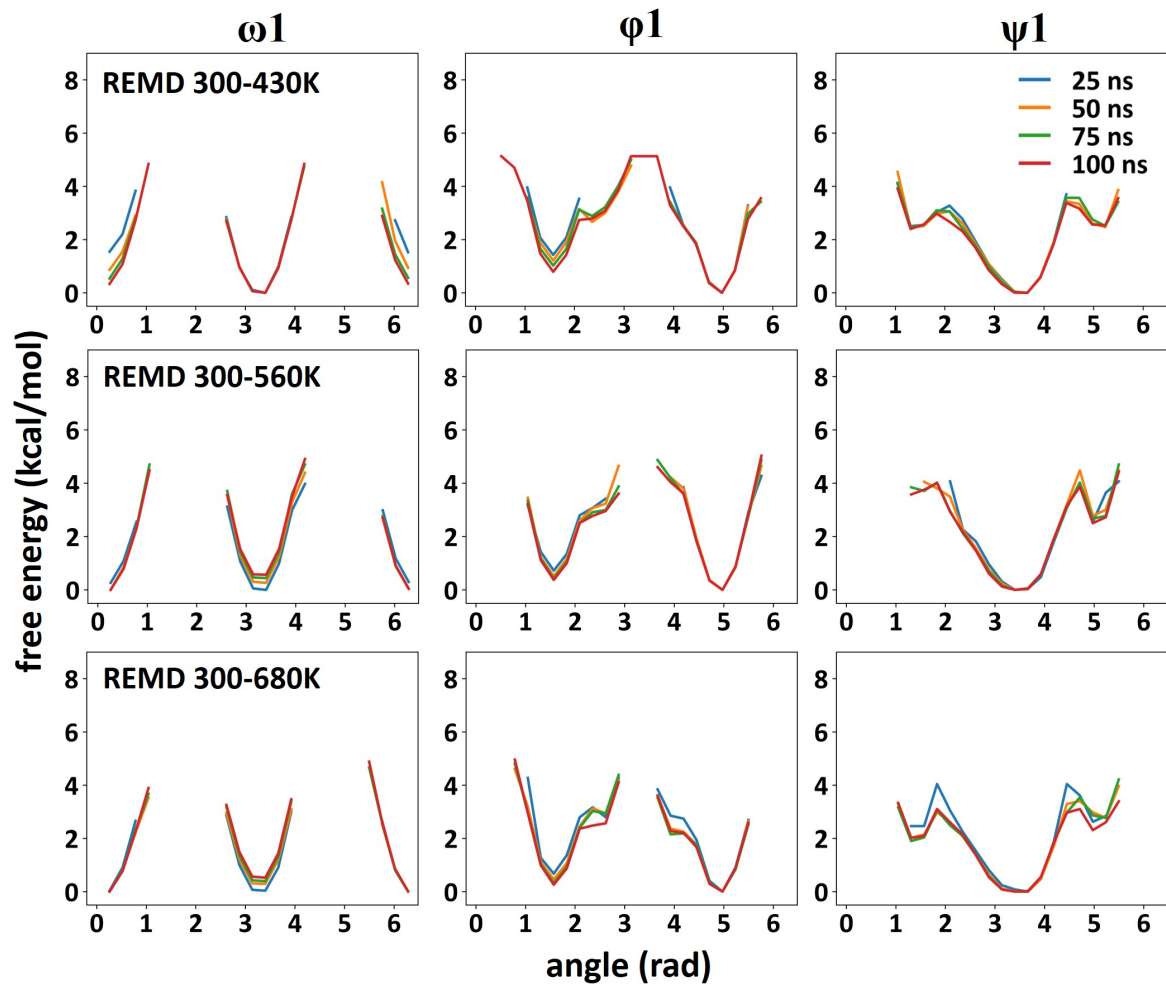

Supplementary Figure 6: Assessing the convergence of different REMD simulations of peptoid trimer  $(s1pe)_3$ . Free energy curves of first three angles of the peptoid trimer  $(s1pe)_3$  derived from different REMD trajectories at 300K.

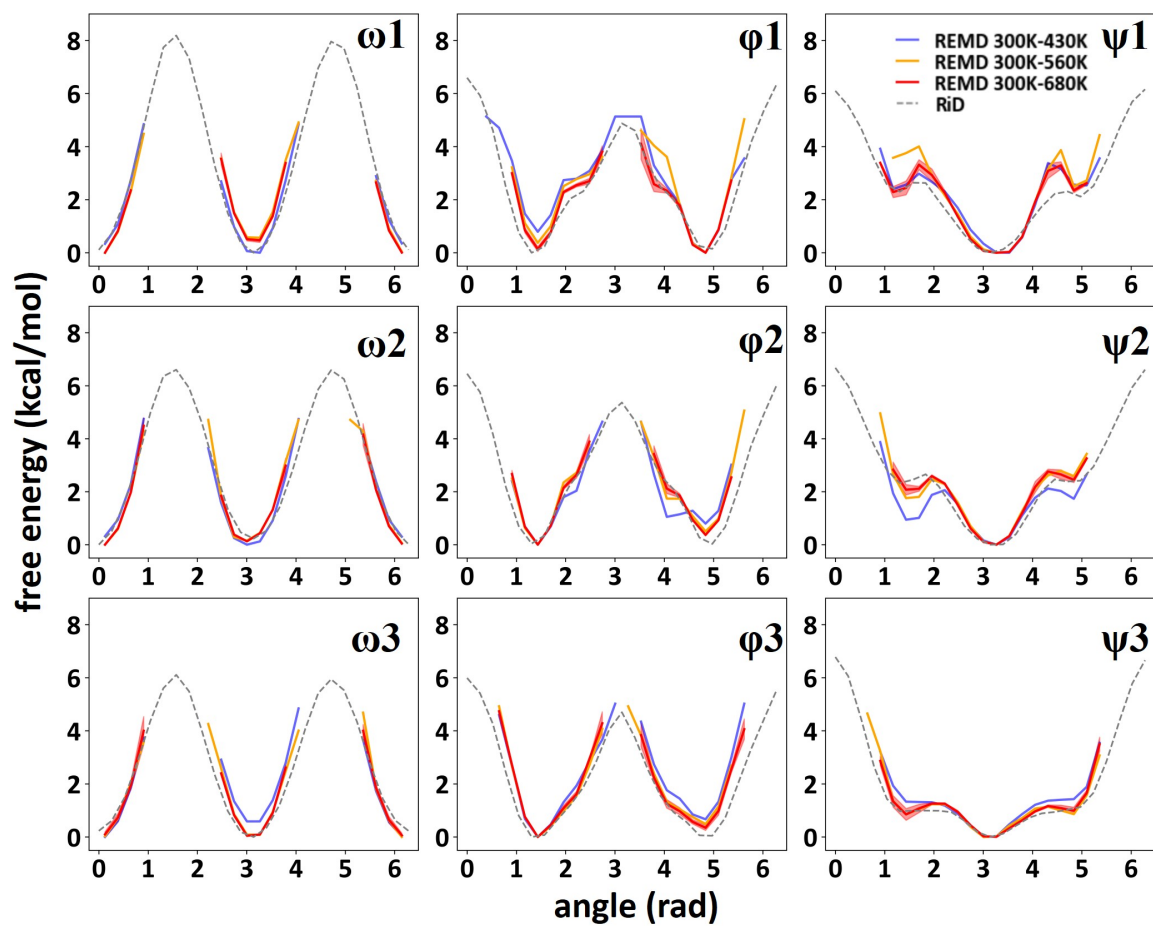

Supplementary Figure 7: The comparison of the free energy curve of each angle of the peptoid trimer (s1pe)<sub>3</sub> derived from different REMD trajectories at 300K and RiD. The error bar of the red line is calculated from three independent simulations.



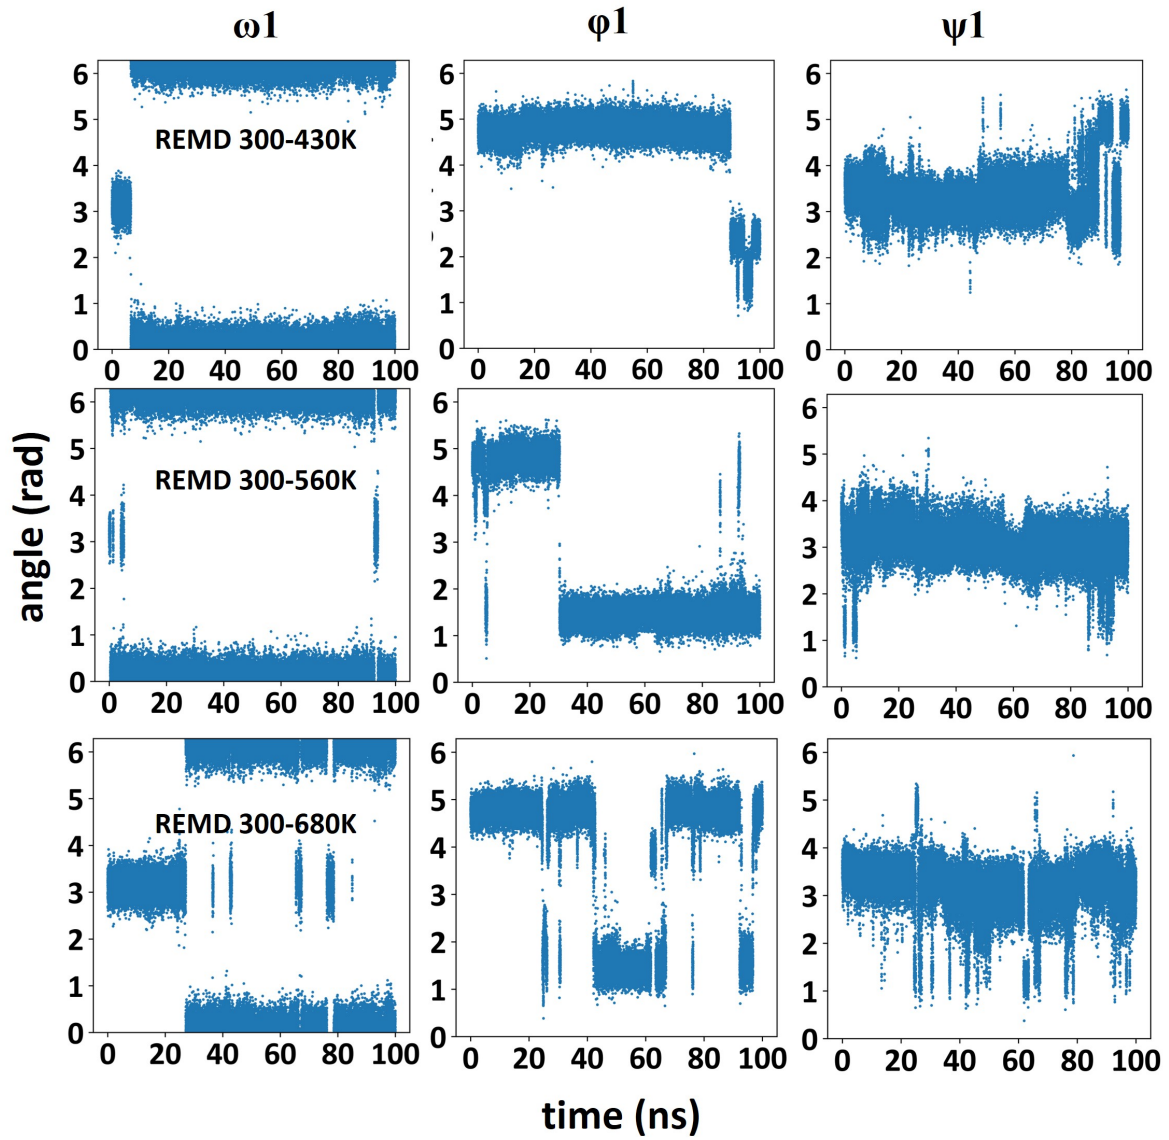

Supplementary Figure 8: Blue dots represent the torsion angles  $\omega_1$ ,  $\phi_1$  and  $\psi_1$  of the peptoid trimer (s1pe)3 as a function of the simulation time of different REMD simulations.

Supplementary TABLE 1: The comparison of the number of transitions of torsion angles  $\omega$  ( $C\alpha$ , C, N,  $C\alpha$ ) and  $\phi$  (C, N,  $C\alpha$ , C) of s1pe between adaptive RiD and original RiD.

| walker | $\omega_{aRiD}$ | $\phi_{aRiD}$ | $\omega_{RiD}$ | $\phi_{RiD}$ |
|--------|-----------------|---------------|----------------|--------------|
| 000    | 2               | 34            | 1              | 3            |
| 001    | 4               | 45            | 3              | 9            |
| 002    | 4               | 29            | 3              | 8            |
| 003    | 3               | 37            | 1              | 11           |
| 004    | 4               | 22            | 3              | 15           |
| 005    | 6               | 24            | 0              | 13           |
| 006    | 7               | 27            | 1              | 6            |
| 007    | 2               | 31            | 1              | 10           |
| 008    | 5               | 29            | 3              | 18           |
| 009    | 3               | 16            | 3              | 10           |
| 010    | 4               | 38            | 2              | 28           |
| 011    | 3               | 25            | 1              | 8            |
| total  | 47              | 357           | 22             | 139          |

Supplementary TABLE 2: The number of transitions of six torsion angles  $\omega_1, \omega_2, \omega_3, \phi_1, \phi_2, \phi_3$  of (slpe)3 in adaptive RiD.

| walker | $\omega_1$ | $\omega_2$ | $\omega_3$ | $\phi_1$ | $\phi_2$ | $\phi_3$ |
|--------|------------|------------|------------|----------|----------|----------|
| 000    | 9          | 1          | 3          | 35       | 6        | 12       |
| 001    | 15         | 1          | 1          | 13       | 6        | 36       |
| 002    | 38         | 8          | 7          | 11       | 10       | 41       |
| 003    | 27         | 3          | 5          | 9        | 1        | 48       |
| 004    | 33         | 2          | 1          | 17       | 12       | 18       |
| 005    | 31         | 7          | 7          | 8        | 6        | 46       |
| 006    | 11         | 1          | 3          | 12       | 0        | 25       |
| 007    | 14         | 4          | 3          | 12       | 3        | 35       |
| 008    | 12         | 2          | 5          | 10       | 1        | 28       |
| 009    | 18         | 4          | 4          | 7        | 3        | 29       |
| 010    | 20         | 3          | 10         | 22       | 5        | 44       |
| 011    | 19         | 11         | 8          | 10       | 1        | 31       |
| total  | 247        | 47         | 57         | 166      | 54       | 393      |

Supplementary TABLE 3: The deviation of the reconstructed free-energy (kcal/mol) of REMD 300-680K of 100ns, BEMetaD, PBMetaD and adaptive RiD from the reference, REMD 300-680K of 400ns.

| methods   | $\omega_1$ | $\phi_1$ | $\psi_1$ | $\omega_2$ | $\phi_2$ | $\psi_2$ | $\omega_3$ | $\phi_3$ | $\psi_3$ | average |
|-----------|------------|----------|----------|------------|----------|----------|------------|----------|----------|---------|
| REMD100ns | 0.1185     | 0.3841   | 0.3697   | 0.1498     | 0.0971   | 0.1233   | 0.1212     | 0.2252   | 0.1474   | 0.1929  |
| BE0.2     | 1.0602     | 1.2210   | 0.7910   | 1.3004     | 0.9046   | 0.6460   | 0.7650     | 0.6148   | 0.6713   | 0.8860  |
| BE0.5     | 1.1686     | 1.0603   | 0.6663   | 1.0742     | 1.0752   | 0.5910   | 0.9383     | 0.7722   | 0.5952   | 0.8824  |
| BE0.8     | 0.9640     | 0.9357   | 0.7015   | 1.0658     | 1.3056   | 0.8811   | 1.0833     | 0.7544   | 0.7624   | 0.9393  |
| PB0.5     | 1.1003     | 1.1909   | 1.0549   | 1.2253     | 1.6884   | 1.2703   | 0.9484     | 0.6509   | 0.5353   | 1.0738  |
| RiD       | 1.1501     | 1.1430   | 0.9483   | 1.0240     | 0.8184   | 0.6552   | 0.8730     | 0.9347   | 0.6006   | 0.9053  |

Supplementary TABLE 4: The total number of transitions of six torsion angles  $\omega_1$ ,  $\omega_2$ ,  $\omega_3$ ,  $\phi_1$ ,  $\phi_2$ ,  $\phi_3$  of (s1pe)3 in different REMD simulations.

| Temperature range | $\omega_1$ | $\omega_2$ | $\omega_3$ | $\phi_1$ | $\phi_2$ | $\phi_3$ |
|-------------------|------------|------------|------------|----------|----------|----------|
| REMD 300-430K     | 25         | 34         | 26         | 43       | 46       | 12       |
| REMD 300-560K     | 635        | 311        | 357        | 680      | 221      | 1273     |
| REMD 300-680K     | 2817       | 1362       | 1699       | 1992     | 713      | 3548     |

Supplementary TABLE 5: The comparison of transition rate (number/ $\mu s$ ) of chignolin among BEMetaD, PBMetaD and adaptive RiD. RMSD with respect to a reference folded state of chignolin are smoothed using 3-ns-width windows.

| methods | folding rate | unfolding rate |
|---------|--------------|----------------|
| BE0.2   | 3.24         | 0.93           |
| BE0.5   | 2.31         | 0.46           |
| BE0.8   | 4.63         | 0.46           |
| PB0.5   | <b>5.56</b>  | 3.24           |
| RiD     | 4.30         | <b>4.30</b>    |
